# Supplementary material for: BRAF alteration status and the histone H3F3A gene K27M mutation segregate spinal cord astrocytoma histology
Source: Springer Nature journal article supplement (doi:10.1007/s00401-015-1492-2), 2015-10-20

Supplementary Figure 1

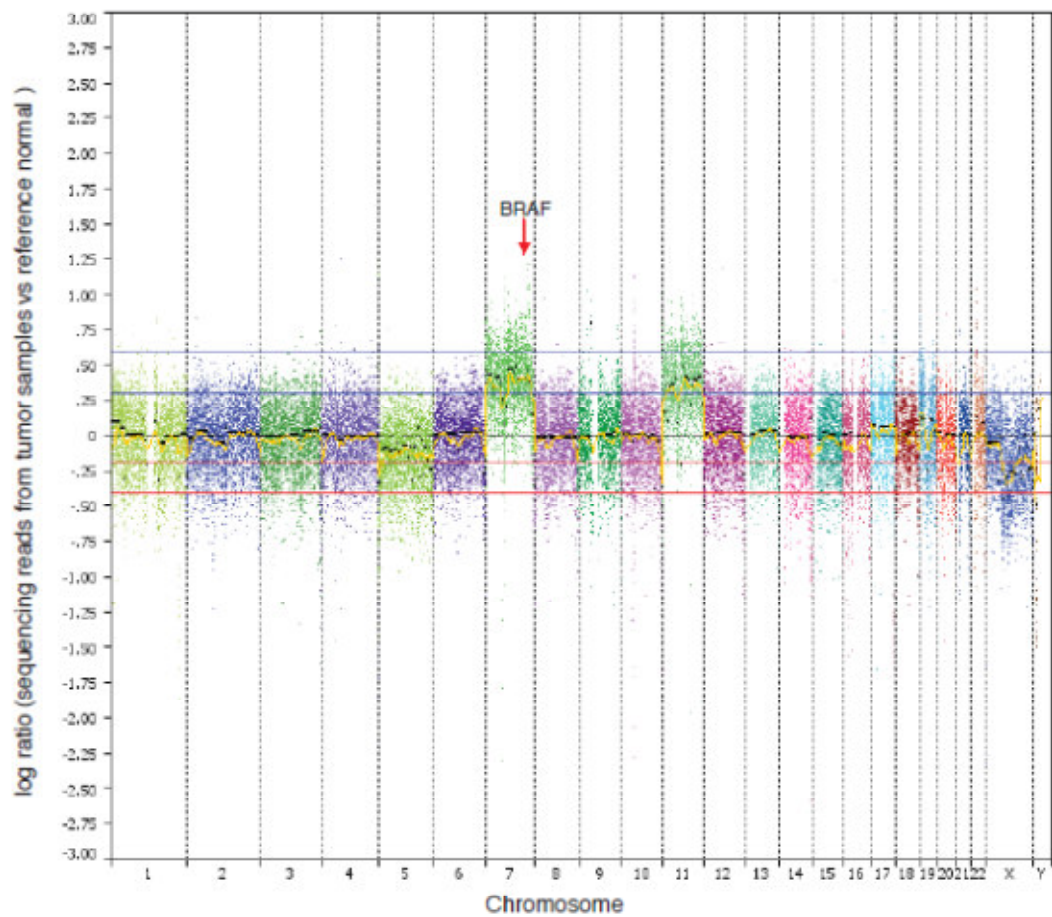

Supplementary Figure 2

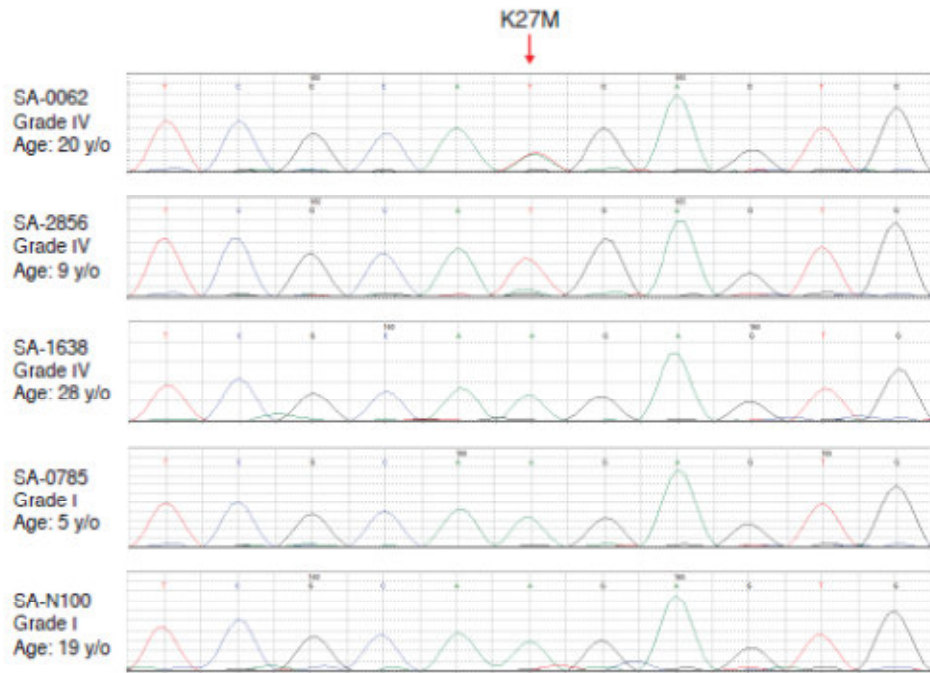

Supplementary Figure 3

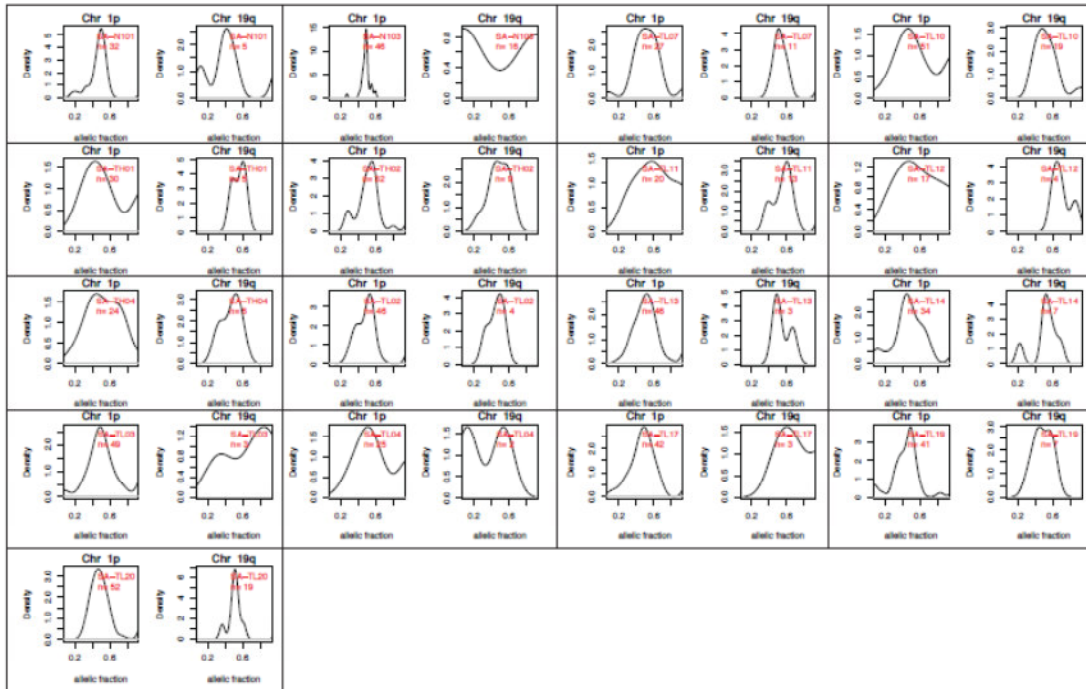

Supplement: MOESM3 [file 8405002]
